# Supplementary material for: Electrochemical performance and structural evolution of spray pyrolyzed Mn3O4 thin films in different aqueous electrolytes: effect of anions and cations
Source: Royal Society of Chemistry journal article supplement (doi:10.1039/d4ra05426a), 2024-01-01
Supplement: d4ra05426a1.pdf [file d4ra05426a1.pdf]

## Supporting Information

### Electrochemical Performance and Structural Evolution of Spray Pyrolyzed $\text{Mn}_3\text{O}_4$ Thin Films in Different Aqueous Electrolytes: Effect of Anions and Cations

Pramitha Adoor.<sup>1</sup>, Shreeganesh Subraya Hegde <sup>2</sup>, Badekai Ramachandra Bhat <sup>2</sup>, Sajan D. George<sup>3</sup>, Raviprakash Yeenduguli <sup>1\*</sup>

<sup>1</sup>\*Semiconductor and Photovoltaics Lab, Department of Physics, Manipal Institute of Technology, Manipal Academy of Higher Education, Manipal-576104, Karnataka, India

<sup>2</sup>Catalysis and Materials Chemistry Laboratory, Department of Chemistry, National Institute of Technology Karnataka, Surathkal, Mangalore-575025, Karnataka, India

<sup>3</sup>Centre for Applied Nanosciences, Department of Atomic and Molecular Physics, Manipal Academy of Higher Education, Manipal, 576104, Karnataka, India

\*Corresponding Author: Dr Raviprakash Y – [raviprakash.y@manipal.edu](mailto:raviprakash.y@manipal.edu)

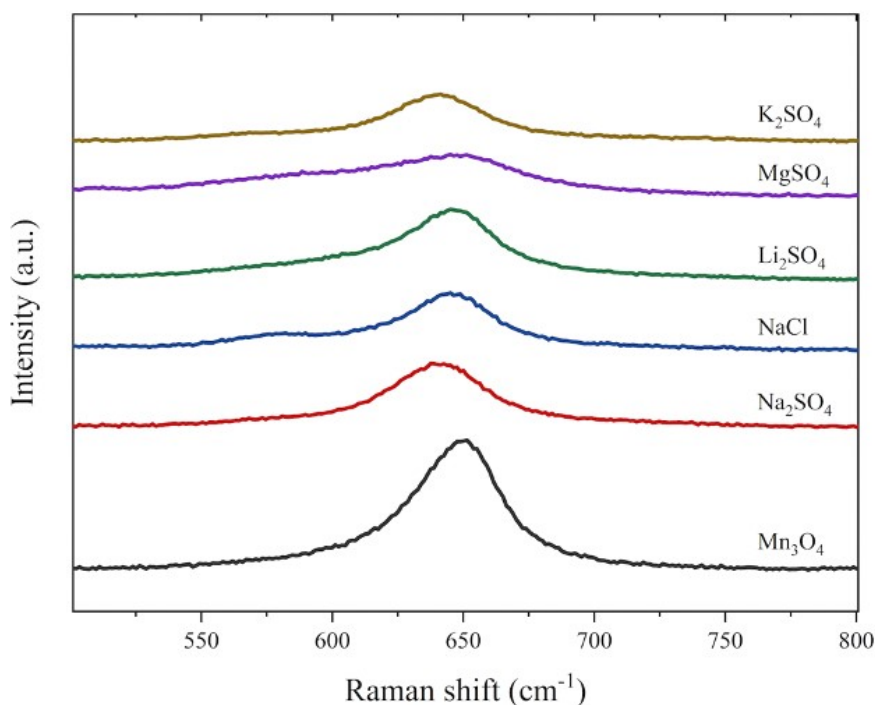

Figure S1: Comparison of Raman spectra before and after cycling in different electrolytes (in higher wavenumber region).

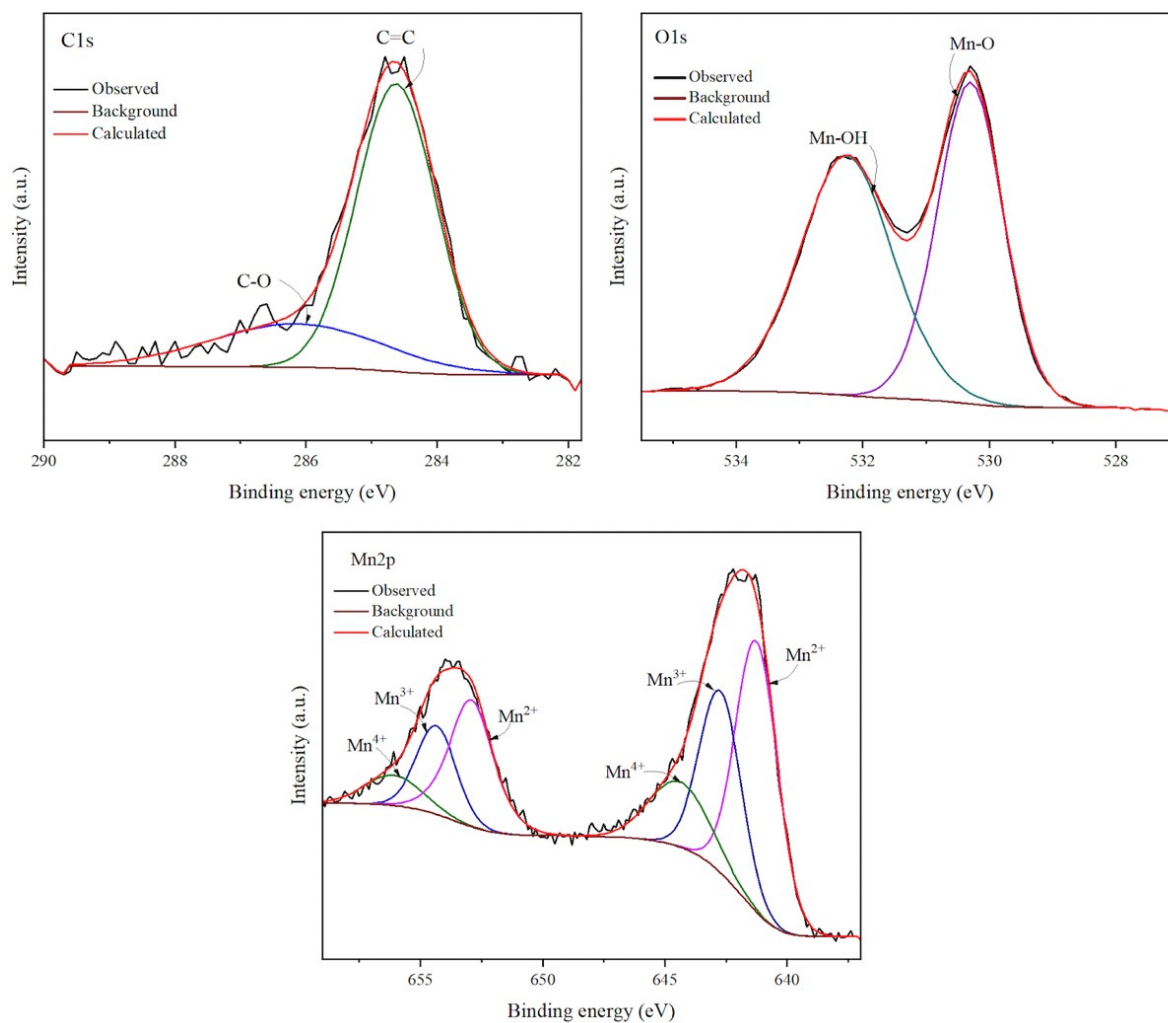

Figure S2: XPS core spectra of (a) C 1s, (b) O 1s and (c) Mn 2p of the electrode before cycling.

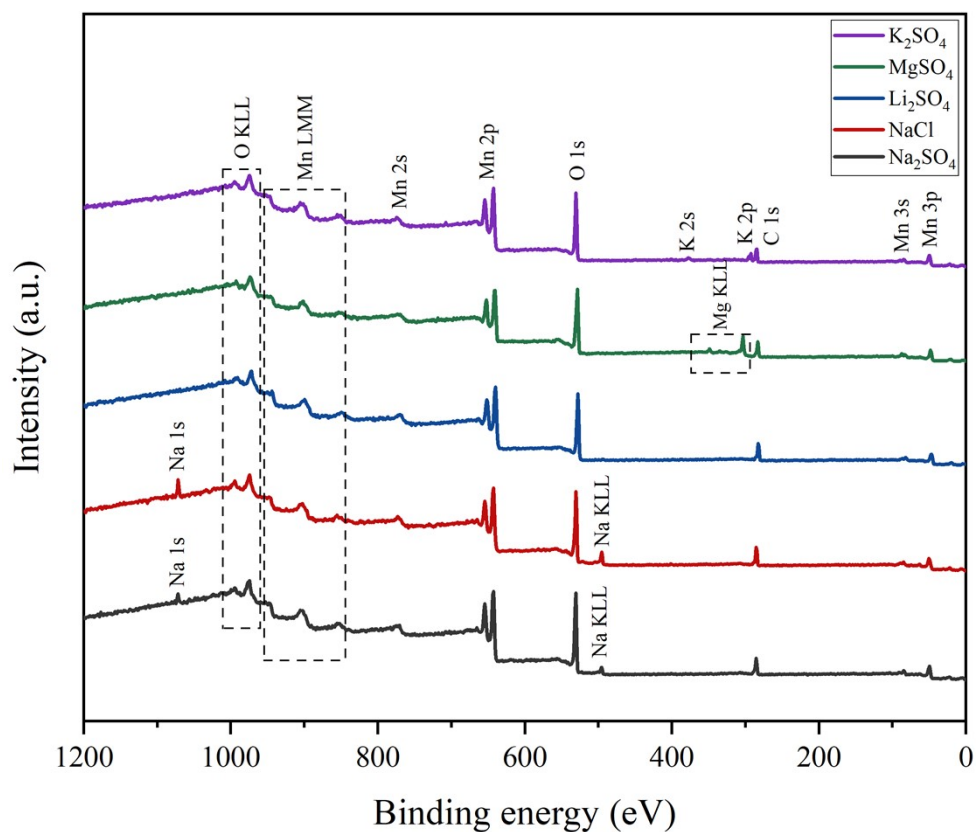

Figure S3: XPS Survey spectra of the electrodes after cycling in different electrolytes.

Table S1: Peak position, FWHM and area under the peaks obtained from XPS deconvolution.

| Electrolyte used                | Spin orbit split     | Energy difference (eV) | Mn state         | Peak position | FWHM | Area under the peak | Mn <sup>3+</sup> /Mn <sup>2+</sup> | Mn <sup>2+</sup> /Mn <sup>4+</sup> |
|---------------------------------|----------------------|------------------------|------------------|---------------|------|---------------------|------------------------------------|------------------------------------|
| Before cycling                  | Mn 2p <sub>3/2</sub> | 11.75                  | Mn <sup>2+</sup> | 641.25        | 2.02 | 30050               | 0.66                               | 2.88                               |
|                                 |                      |                        | Mn <sup>3+</sup> | 642.73        | 2.00 | 19990               |                                    |                                    |
|                                 |                      |                        | Mn <sup>4+</sup> | 644.40        | 2.90 | 10400               |                                    |                                    |
|                                 | Mn 2p <sub>1/2</sub> |                        | Mn <sup>2+</sup> | 652.92        | 2.10 | 15500               |                                    |                                    |
|                                 |                      |                        | Mn <sup>3+</sup> | 654.35        | 1.90 | 9300                |                                    |                                    |
|                                 |                      |                        | Mn <sup>4+</sup> | 656.09        | 2.75 | 4600                |                                    |                                    |
| Na <sub>2</sub> SO <sub>4</sub> | Mn 2p <sub>3/2</sub> | 11.79                  | Mn <sup>2+</sup> | 640.84        | 1.58 | 11646               | 2.19                               | 0.91                               |
|                                 |                      |                        | Mn <sup>3+</sup> | 642.09        | 2.05 | 25570               |                                    |                                    |
|                                 |                      |                        | Mn <sup>4+</sup> | 643.44        | 2.84 | 12834               |                                    |                                    |
|                                 | Mn                   |                        | Mn <sup>2+</sup> | 652.53        | 2.52 | 6827                |                                    |                                    |

|                                 |                   |       |                  |        |      |       |      |      |
|---------------------------------|-------------------|-------|------------------|--------|------|-------|------|------|
|                                 | 2p <sub>1/2</sub> |       | Mn <sup>3+</sup> | 653.70 | 2.17 | 13504 |      |      |
|                                 |                   |       | Mn <sup>4+</sup> | 655.25 | 2.90 | 6561  |      |      |
| NaCl                            | Mn                | 11.73 | Mn <sup>2+</sup> | 640.70 | 2.33 | 9030  | 2.38 | 0.59 |
|                                 | 2p <sub>3/2</sub> |       | Mn <sup>3+</sup> | 641.97 | 2.04 | 21580 |      |      |
|                                 |                   |       | Mn <sup>4+</sup> | 643.15 | 3.00 | 15890 |      |      |
|                                 | Mn                |       | Mn <sup>2+</sup> | 652.33 | 2.35 | 4958  |      |      |
|                                 | 2p <sub>1/2</sub> |       | Mn <sup>3+</sup> | 653.57 | 2.10 | 11531 |      |      |
|                                 |                   |       | Mn <sup>4+</sup> | 654.80 | 3.00 | 7904  |      |      |
| Li <sub>2</sub> SO <sub>4</sub> | Mn                | 11.69 | Mn <sup>2+</sup> | 640.74 | 2.00 | 10850 | 2.28 | 0.89 |
|                                 | 2p <sub>3/2</sub> |       | Mn <sup>3+</sup> | 641.99 | 2.05 | 24799 |      |      |
|                                 |                   |       | Mn <sup>4+</sup> | 643.65 | 2.76 | 12169 |      |      |
|                                 | Mn                |       | Mn <sup>2+</sup> | 652.31 | 2.15 | 5567  |      |      |
|                                 | 2p <sub>1/2</sub> |       | Mn <sup>3+</sup> | 653.56 | 2.10 | 12972 |      |      |
|                                 |                   |       | Mn <sup>4+</sup> | 655.32 | 3.00 | 6209  |      |      |
| MgSO <sub>4</sub>               | Mn                | 11.71 | Mn <sup>2+</sup> | 641.10 | 2.04 | 6500  | 3.32 | 0.57 |
|                                 | 2p <sub>3/2</sub> |       | Mn <sup>3+</sup> | 642.37 | 2.00 | 21624 |      |      |
|                                 |                   |       | Mn <sup>4+</sup> | 643.89 | 2.68 | 11000 |      |      |
|                                 | Mn                |       | Mn <sup>2+</sup> | 652.70 | 2.22 | 4500  |      |      |
|                                 | 2p <sub>1/2</sub> |       | Mn <sup>3+</sup> | 654.00 | 2.15 | 11420 |      |      |
|                                 |                   |       | Mn <sup>4+</sup> | 655.60 | 2.80 | 5000  |      |      |
| K <sub>2</sub> SO <sub>4</sub>  | Mn                | 11.71 | Mn <sup>2+</sup> | 640.94 | 1.85 | 9500  | 2.49 | 0.75 |
|                                 | 2p <sub>3/2</sub> |       | Mn <sup>3+</sup> | 642.20 | 2.04 | 23675 |      |      |
|                                 |                   |       | Mn <sup>4+</sup> | 643.52 | 2.75 | 12560 |      |      |
|                                 | Mn                |       | Mn <sup>2+</sup> | 652.60 | 2.20 | 5390  |      |      |
|                                 | 2p <sub>1/2</sub> |       | Mn <sup>3+</sup> | 653.80 | 2.14 | 11891 |      |      |
|                                 |                   |       | Mn <sup>4+</sup> | 655.17 | 2.65 | 6150  |      |      |

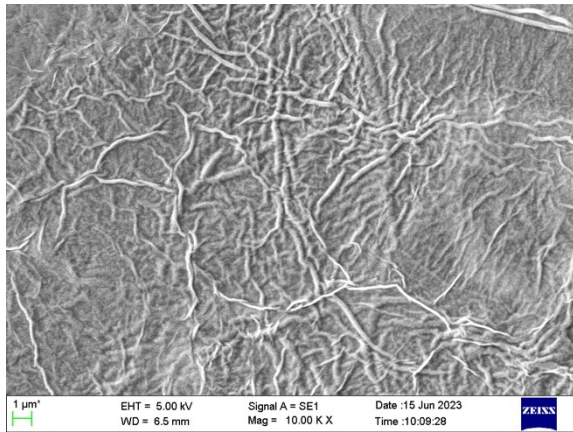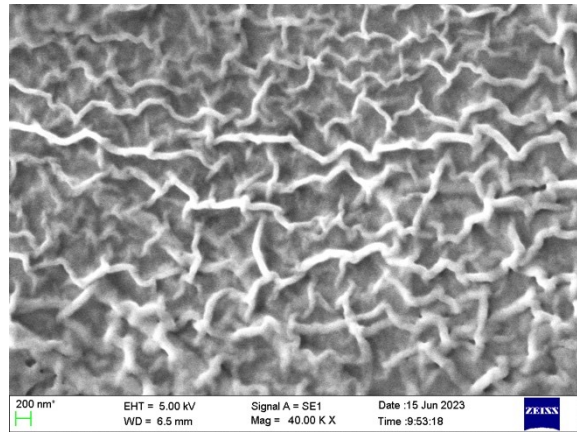

Figure S4: Different magnification SEM images of  $\text{Mn}_3\text{O}_4$  thin film electrode before cycling

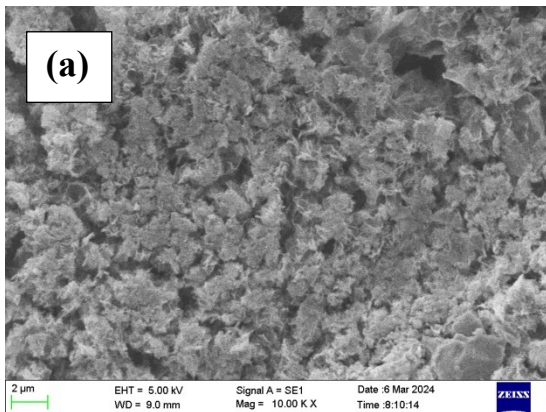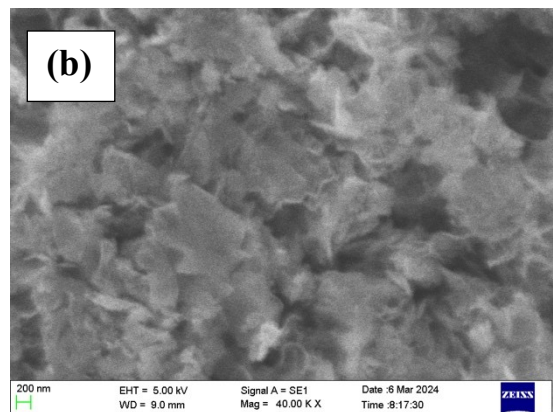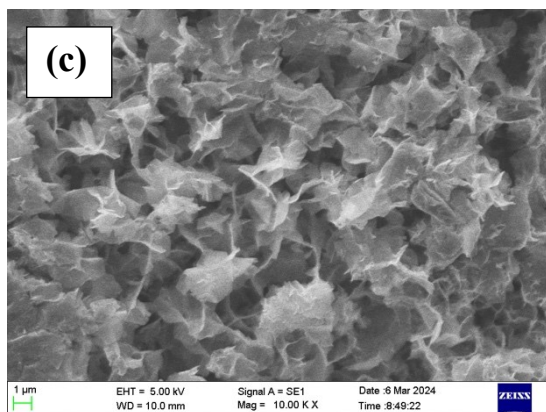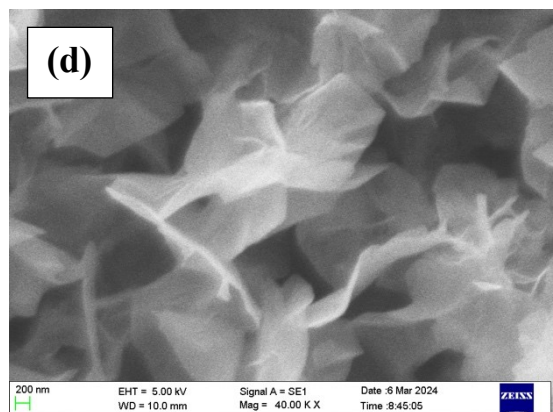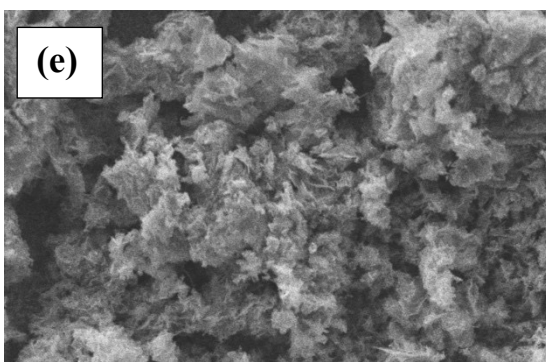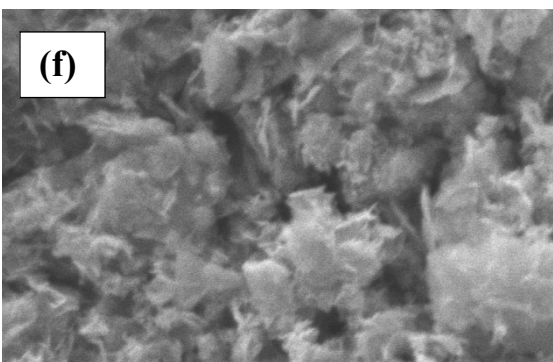



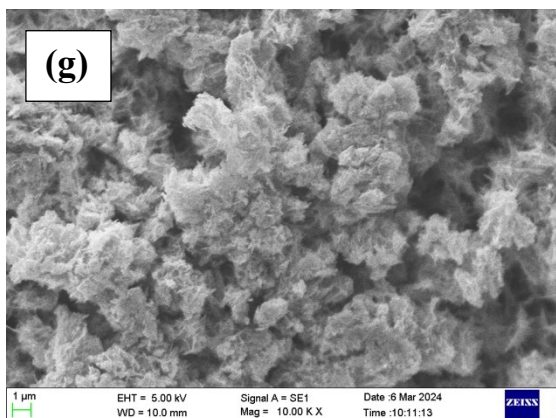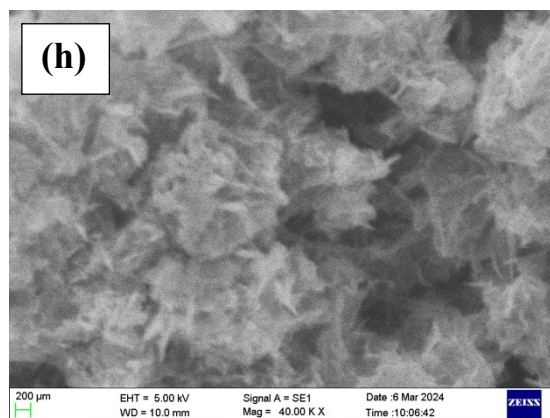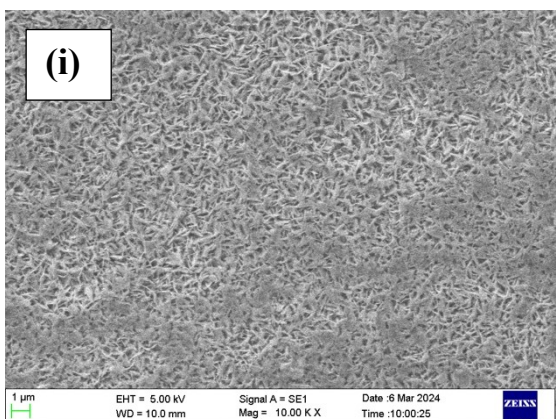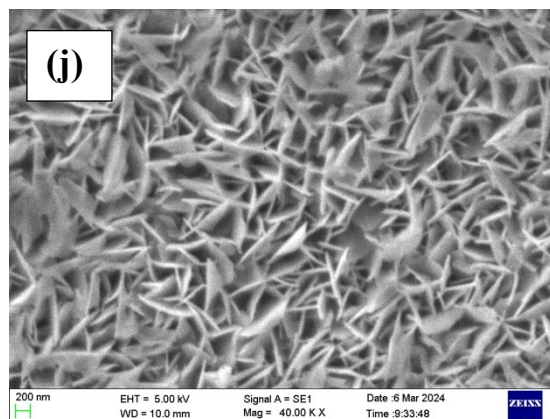

Figure S5: Different magnification SEM images of  $\text{Mn}_3\text{O}_4$  thin film electrode after processed in (a) & (b)  $\text{Na}_2\text{SO}_4$ , (c) & (d)  $\text{NaCl}$ , (e) & (f)  $\text{Li}_2\text{SO}_4$ , (g) & (h)  $\text{K}_2\text{SO}_4$ , and (i) & (j)  $\text{MgSO}_4$  for 500 CV cycles at 50 mV/s.

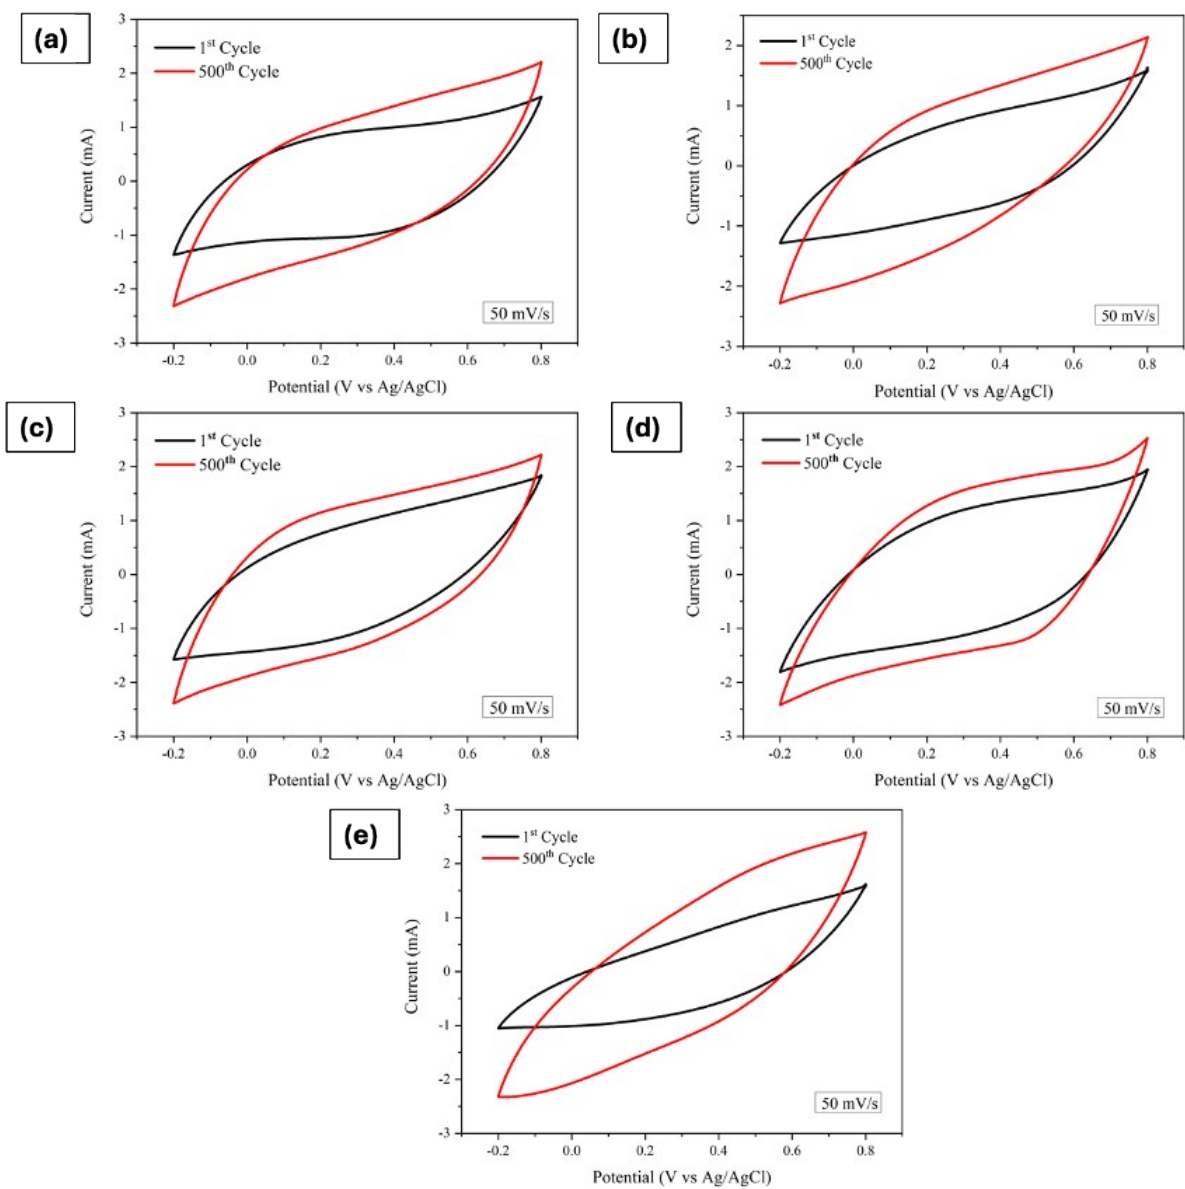

Figure S6: Comparison of 1<sup>st</sup> and 500<sup>th</sup> CV cycles of the electrodes processed in (a)  $\text{Na}_2\text{SO}_4$ , (b)  $\text{NaCl}$ , (c)  $\text{Li}_2\text{SO}_4$ , (d)  $\text{K}_2\text{SO}_4$  and (e)  $\text{MgSO}_4$ .
